# Supplementary material for: Work Shift, Lifestyle Factors, and Subclinical Atherosclerosis in Spanish Male Workers: A Mediation Analysis
Source: MDPI journal article supplement (doi:10.3390/nu13041077), 2021-03-26
Supplement: s1 [file s1]

**Table S1.** Food and beverage consumption and nutrient intake of the AWHs participants according to type of work shift.

|                           | Total<br>( <i>n</i> =2459) | Central<br>( <i>n</i> =207) | Rotating M-E<br>( <i>n</i> =1493) | Rotating M-E-N<br>( <i>n</i> =499) | Night<br>( <i>n</i> =260) | <i>p</i> -value  |
|---------------------------|----------------------------|-----------------------------|-----------------------------------|------------------------------------|---------------------------|------------------|
| <b>Foods</b>              |                            |                             |                                   |                                    |                           |                  |
| Fruits, g/day             | 305 ± 181                  | 288 ± 156                   | 303 ± 184                         | 318 ± 184                          | 303 ± 174                 | 0.187            |
| Missing, <i>n</i> (%)     | 3 (0.1)                    | -                           | 3 (0.2)                           | -                                  | -                         |                  |
| Vegetables, g/day         | 322 ± 131                  | 323 ± 114                   | 318 ± 129                         | 338 (±147)                         | 315 ± 124                 | <b>0.018</b>     |
| Missing, <i>n</i> (%)     | 1 (0.0)                    | -                           | 1 (0.1)                           | -                                  | -                         |                  |
| Legumes, g/day            | 16.2 ± 7.27                | 15.3 ± 5.90                 | 16.3 ± 7.00                       | 16.5 ± 9.09                        | 15.3 ± 5.63               | 0.057            |
| Missing, <i>n</i> (%)     |                            |                             |                                   |                                    |                           |                  |
| Nuts, g/day               | 10.4 ± 12.4                | 10.3 ± 10.8                 | 9.98 ± 12.6                       | 11.4 ± 12.7                        | 10.7 ± 12.1               | 0.184            |
| Missing, <i>n</i> (%)     | 1 (0.0)                    | -                           | -                                 | -                                  | 1 (0.4)                   |                  |
| Olive oil, g/day          | 27.6 ± 12.2                | 27.1 ± 10.9                 | 27.4 ± 12.3                       | 29.6 ± 12.8                        | 25.6 ± 10.3               | <b>&lt;0.001</b> |
| Fish, g/day               | 86.4 ± 46.1                | 101 ± 46.1                  | 83.8 ± 46.9                       | 91.3 ± 45.6                        | 81.3 ± 38.6               | <b>&lt;0.001</b> |
| Processed red meat, g/day | 187 ± 71.4                 | 171 ± 62.3                  | 189 ± 73.5                        | 188 ± 69.6                         | 187 ± 68.1                | <b>0.013</b>     |
| Missing, <i>n</i> (%)     | 1 (0.0)                    | -                           | 1 (0.1)                           | -                                  | -                         |                  |
| <b>Nutrients</b>          |                            |                             |                                   |                                    |                           |                  |
| ratio MUFA:SFA            | 1.62 ± 0.32                | 1.69 ± 0.31                 | 1.61 ± 0.32                       | 1.65 ± 0.34                        | 1.59 ± 0.29               | <b>&lt;0.001</b> |
| Trans fats, g/day         | 0.86 ± 0.48                | 0.74 ± 0.42                 | 0.88 ± 0.49                       | 0.87 ± 0.46                        | 0.839 ± 0.47              | <b>&lt;0.001</b> |
| Total fiber, g/day        | 25.4 ± 8.00                | 24.2 ± 7.66                 | 25.5 ± 8.09                       | 26.1 ± 7.95                        | 24.7 ± 7.73               | <b>0.012</b>     |
| Sodium, mg/day            | 3270 ± 1130                | 2810 ± 999                  | 3360 ± 1140                       | 3270 ± 1140                        | 3170 ± 1050               | <b>&lt;0.001</b> |
| Alcohol, g ethanol/day    | 21.3 ± 20.0                | 17.9 ± 16.4                 | 21.7 ± 20.4                       | 21.6 ± 19.9                        | 21.6 ± 19.8               | 0.081            |
| <b>Beverages</b>          |                            |                             |                                   |                                    |                           |                  |
| Soft drinks, mL/day       | 64.3 ± 127                 | 38.5 ± 72.8                 | 67.5 ± 120                        | 61.0 ± 143                         | 72.5 ± 157                | <b>0.012</b>     |
| Missing, <i>n</i> (%)     | 1 (0.0)                    | -                           | 1 (0.1)                           | -                                  | -                         |                  |
| Wine, mL/day              | 92.5 ± 123                 | 77.9 ± 94.3                 | 93.6 ± 126                        | 94.2 ± 123                         | 94.3 ± 123                | 0.361            |
| Missing, <i>n</i> (%)     | 1 (0.0)                    | 1 (0.5)                     | -                                 | -                                  | -                         |                  |
| Beer, mL/day              | 299 ± 375                  | 241 ± 290                   | 307 ± 383                         | 302 ± 404                          | 293 ± 331                 | 0.127            |
| Missing, <i>n</i> (%)     | 1 (0.0)                    | -                           | 1 (0.1)                           | -                                  | -                         |                  |
| Spirits, mL/day           | 6.90 ± 13.2                | 6.57 ± 10.6                 | 6.86 ± 13.3                       | 6.66 ± 12.9                        | 7.84 ± 14.4               | 0.651            |
| Coffee, mL/day            | 95.8 ± 80.5                | 101 ± 75.1                  | 92.2 ± 78.7                       | 102 ± 84.8                         | 101 ± 85.4                | <b>0.049</b>     |

Data are presented as *n* (%) or mean ± SD; Central - Central-day shift; M-E – morning/evening rotation shift; M-E-N – morning/evening/night rotation shift; Night – night shift; MUFA – mono-unsaturated fatty acids; SFA – saturated fatty acids, *p*-value obtained using ANOVA for continuous variables and Chi-square for categorical variables.

**Table S2.** Estimation of the mediation effect of lifestyle and biological risk factors in the association between work shift (Morning-Evening versus central shift) and the presence of subclinical atherosclerosis

| Mediator              | Model <sup>a</sup> | Natural direct effect <sup>b</sup> |              |         | Natural indirect effect <sup>b</sup> |              |         | Total effect <sup>b</sup> |              |         | % mediated <sup>b</sup> |
|-----------------------|--------------------|------------------------------------|--------------|---------|--------------------------------------|--------------|---------|---------------------------|--------------|---------|-------------------------|
|                       |                    | OR                                 | 95%CI        | p-value | OR                                   | 95%CI        | p-value | OR                        | 95%CI        | p-value |                         |
| Lifestyle risks       |                    |                                    |              |         |                                      |              |         |                           |              |         |                         |
| Smoking               | 2                  | 1.19                               | [0.86; 1.65] | 0.296   | 1.17                                 | [1.08; 1.26] | <0.001  | 1.39                      | [1.00; 1.94] | 0.052   | -                       |
| Sleep                 | 2                  | 1.20                               | [0.85; 1.69] | 0.296   | 1.02                                 | [1.00; 1.04] | 0.133   | 1.22                      | [0.87; 1.71] | 0.250   | -                       |
| Sitting               | 2                  | 1.20                               | [0.85; 1.69] | 0.296   | 0.95                                 | [0.89; 1.02] | 0.161   | 1.14                      | [0.81; 1.60] | 0.442   | -                       |
| Mediterranean diet    | 2                  | 1.20                               | [0.85; 1.69] | 0.296   | 1.04                                 | [0.99; 1.08] | 0.082   | 1.25                      | [0.89; 1.75] | 0.202   | -                       |
| Coffee                | 2                  | 1.20                               | [0.85; 1.69] | 0.296   | 0.98                                 | [0.96; 1.00] | 0.121   | 1.18                      | [0.84; 1.66] | 0.346   | -                       |
| Metabolic risks       |                    |                                    |              |         |                                      |              |         | [0.00; 0.00]              |              |         |                         |
| SBP                   | 2                  | 1.13                               | [0.80; 1.59] | 0.495   | 1.07                                 | [1.02; 1.12] | 0.005   | 1.20                      | [0.85; 1.70] | 0.296   | -                       |
| Glucose               | 2                  | 1.23                               | [0.88; 1.73] | 0.232   | 0.97                                 | [0.95; 0.99] | 0.036   | 1.20                      | [0.85; 1.69] | 0.297   | -                       |
| HbA1c                 | 2                  | 1.48                               | [0.93; 2.36] | 0.095   | 1.08                                 | [1.01; 1.16] | 0.037   | 1.60                      | [1.02; 2.53] | 0.043   | -                       |
| BMI                   | 2                  | 1.19                               | [0.85; 1.68] | 0.313   | 1.01                                 | [0.99; 1.02] | 0.473   | 1.20                      | [0.85; 1.69] | 0.294   | -                       |
| Waist                 | 2                  | 1.23                               | [0.87; 1.74] | 0.245   | 1.01                                 | [0.99; 1.03] | 0.248   | 1.24                      | [0.88; 1.76] | 0.221   | -                       |
| HDL cholesterol       | 2                  | 1.19                               | [0.85; 1.67] | 0.318   | 1.01                                 | [0.98; 1.03] | 0.508   | 1.20                      | [0.85; 1.69] | 0.296   | -                       |
| Triglycerides         | 2                  | 1.18                               | [0.84; 1.67] | 0.332   | 1.01                                 | [0.99; 1.03] | 0.142   | 1.20                      | [0.85; 1.69] | 0.296   | -                       |
| Framingham Risk Score | 2                  | 1.16                               | [0.82; 1.62] | 0.339   | 1.04                                 | [0.99; 1.09] | 0.148   | 1.20                      | [0.85; 1.69] | 0.298   | -                       |

Exponentiated coefficient (Odds Ratios (OR) and 95% confidence intervals in brackets). Because of multiple comparisons, Bonferroni-adjusted a p-value below or equal to 0.01 for lifestyle risks, and below or equal to 0.003 for metabolic factors, were considered to be statistically significant. <sup>a</sup>Model 2 adjusted for age, participant's educational level, and lifestyle-related confounding variables, except the lifestyle-related variable under study; Model 3 removing the adjustment for smoking, as they were identified as potential mediator in the pathway of shift work and atherosclerosis <sup>b</sup>Estimations of the natural direct, indirect and total effects for rotating Morning-Evening versus central shift. <sup>c</sup>Complete-case-analysis in 2,429 men for lifestyle-related variables and biological risk factors, except for BMI in 2,423 men, for HbA1c in 1,442 and for waist in 2,375 men.

**Table S3.** Estimation of the mediation effect of lifestyle and biological risk factors in the association between work shift (night shift versus central shift) and the presence of subclinical atherosclerosis

| Mediator              | Model <sup>a</sup> | Natural direct effect <sup>b</sup> |              |         | Natural indirect effect <sup>b</sup> |              |         | Total effect <sup>b</sup> |              |         | %mediated <sup>b</sup> |
|-----------------------|--------------------|------------------------------------|--------------|---------|--------------------------------------|--------------|---------|---------------------------|--------------|---------|------------------------|
|                       |                    | OR                                 | 95%CI        | p-value | OR                                   | 95%CI        | p-value | OR                        | 95%CI        | p-value |                        |
| Lifestyle risks       |                    |                                    |              |         |                                      |              |         |                           |              |         |                        |
| Smoking               | 2                  | 1.22                               | [0.81; 1.82] | 0.337   | 1.17                                 | [1.07; 1.28] | 0.005   | 1.42                      | [0.95; 2.14] | 0.090   | -                      |
| Sleep                 | 2                  | 1.23                               | [0.81; 1.87] | 0.337   | 1.03                                 | [1.00; 1.07] | 0.054   | 1.27                      | [0.84; 1.93] | 0.260   | -                      |
| Sitting               | 2                  | 1.23                               | [0.81; 1.87] | 0.377   | 0.96                                 | [0.91; 1.02] | 0.166   | 1.18                      | [0.78; 1.80] | 0.431   | -                      |
| Mediterranean diet    | 2                  | 1.23                               | [0.81; 1.87] | 0.337   | 1.03                                 | [0.99; 1.07] | 0.096   | 1.27                      | [0.83; 1.93] | 0.264   | -                      |
| Coffee                | 2                  | 1.23                               | [0.81; 1.87] | 0.337   | 1.00                                 | [0.98; 1.02] | 0.983   | 1.23                      | [0.81; 1.87] | 0.337   | -                      |
| Metabolic risks       |                    |                                    |              |         |                                      |              |         |                           |              |         |                        |
| SBP                   | 2                  | 1.13                               | [0.74; 1.72] | 0.574   | 1.09                                 | [1.03; 1.16] | 0.004   | 1.23                      | [0.81; 1.88] | 0.335   | -                      |
| HbA1c                 | 2                  | 1.32                               | [0.75; 2.32] | 0.343   | 1.07                                 | [1.01; 1.14] | 0.027   | 1.41                      | [0.80; 2.48] | 0.232   | -                      |
| BMI                   | 2                  | 1.21                               | [0.79; 1.85] | 0.376   | 1.01                                 | [0.98; 1.04] | 0.464   | 1.23                      | [0.80; 1.87] | 0.347   | -                      |
| Waist                 | 2                  | 1.23                               | [0.80; 1.90] | 0.337   | 1.04                                 | [1.00; 1.08] | 0.075   | 1.28                      | [0.83; 1.96] | 0.259   | -                      |
| HDL cholesterol       | 2                  | 1.24                               | [0.82; 1.88] | 0.311   | 0.99                                 | [0.96; 1.02] | 0.573   | 1.23                      | [0.81; 1.87] | 0.336   | -                      |
| Triglycerides         | 2                  | 1.21                               | [0.80; 1.84] | 0.370   | 1.02                                 | [0.99; 1.04] | 0.254   | 1.23                      | [0.81; 1.87] | 0.336   | -                      |
| Framingham Risk Score | 2                  | 1.17                               | [0.77; 1.77] | 0.466   | 1.06                                 | [1.00; 1.13] | 0.116   | 1.23                      | [0.81; 1.87] | 0.338   | -                      |

Exponentiated coefficient (Odds Ratios (OR) and 95% confidence intervals in brackets). Because of multiple comparisons, Bonferroni-adjusted a p-value below or equal to 0.01 for lifestyle risks, and below or equal to 0.003 for metabolic factors, were considered to be statistically significant. <sup>a</sup> Model 2 adjusted for age, participant's educational level, and lifestyle-related confounding variables, except the lifestyle-related variable under study; Model 3 removing the adjustment for smoking, as they were identified as potential mediator in the pathway of shift work and atherosclerosis. <sup>b</sup> Estimations of the natural direct, indirect and total effects for night shift versus central shift. <sup>c</sup> Complete-case-analysis in 2,429 men for lifestyle-related variables and biological risk factors, except for BMI in 2,423 men, for HbA1c in 1,442 and for waist in 2,375 men.
